# Supplementary material for: Maximum Running Speed of Captive Bar-Headed Geese Is Unaffected by Severe Hypoxia
Source: PubMed Central journal article supplement (PMC3977980; doi:10.1371/journal.pone.0094015), 2014-04-07

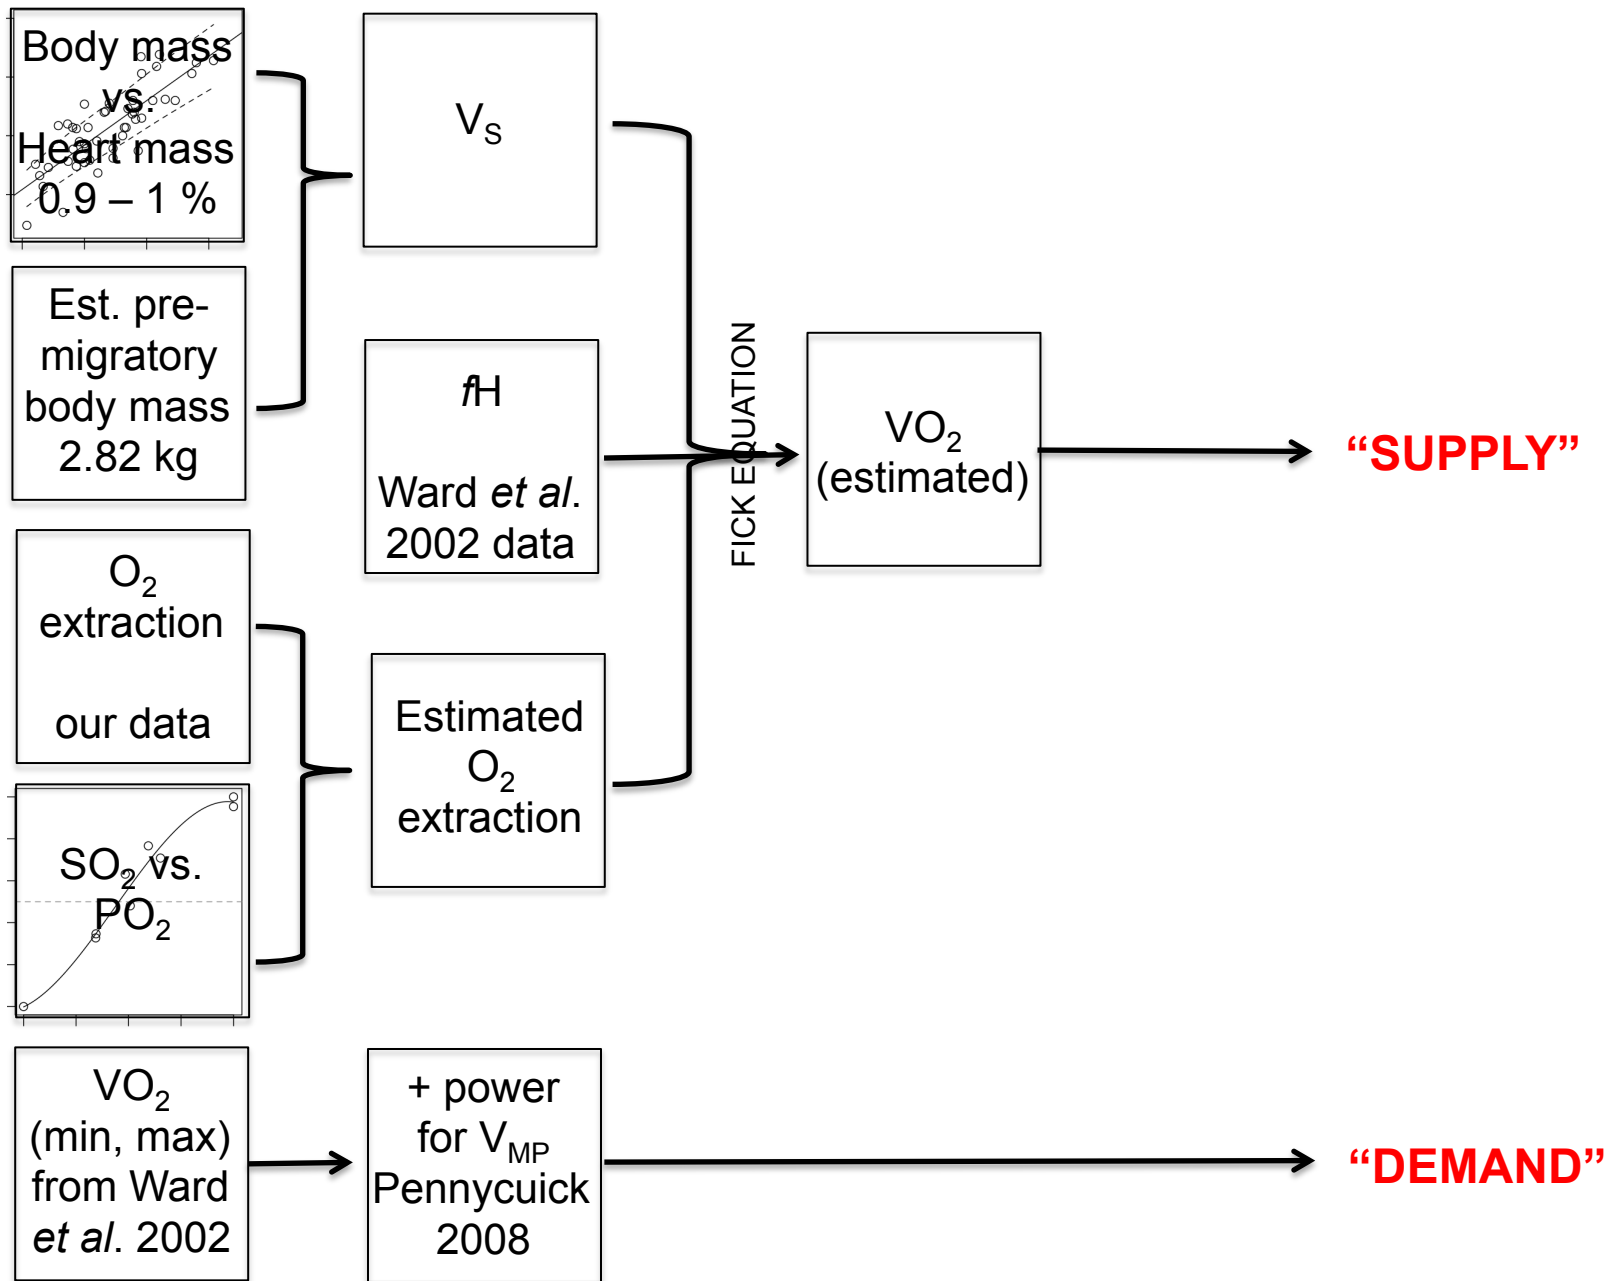

Supplement: pone.0094015.s001.pdf [file pone.0094015.s001.pdf]
